# Supplementary material
Source: publisher figshare collection journal article supplement (https://acs.figshare.com/ndownloader/files/9410161)
Supplement: Supplementary file 1 [file 9410161]

Compound	SMILE	ASIC1a pIC50
1	CC(C1=CC=C(CC(C)C)C=C1)C(O)=O	3.53 ± 0.05
2	FC(C1=CC=C(CC(C)C)C=C1)C(O)=O	3.02 ± 0.04
3	CC(C1=CC=C(CC(C)C)C=C1)[N](O)=O	< 2
4	CC(C1=CC=C(CC(C)C)C=C1)C(C)=O	< 2
5	CC(C1=CC=C(CC(C)C)C=C1)CO	< 2
6	C[C@H](C1=CC=C(CC(C)C)C=C1)C(O)=O	3.54 ± 0.11
7	C[C@@H](C1=CC=C(CC(C)C)C=C1)C(O)=O	3.46 ± 0.05
8	CC(C)CC(C=C1)=CC=C1C(O)=O	3.38 ± 0.08
9	CC(C1=CC=C(C)C=C1)C(O)=O	< 2
10	CC(C1=CC=C(C2=CC=CC=C2)C(F)=C1)C(O)=O	3.77 ± 0.06
11	O=C(O)CC1=CC=C(CC(C)C)C=C1	2.99 ± 0.11
12	O=C(O)C(C1=CC=C(CC(C)C)C=C1)CC	3.74 ± 0.05
13	O=C(O)C(C1=CC=C(CC(C)C)C=C1)C(C)C	3.49 ± 0.08
14	O=C(O)C1(CC1)C2=CC=C(CC(C)C)C=C2	3.49 ± 0.06
